1 **Title**

2 Estimating animal density in three dimensions using capture-frequency data from remote detectors

3 **Authors and affiliations**

4 Juan S. Vargas Soto<sup>1,2,\*</sup>, Rowshyra A. Castañeda<sup>1,2</sup>, Nicholas E. Mandrak<sup>1,2</sup> and Péter K. Molnár<sup>1,2</sup>

5 <sup>1</sup> Department of Ecology and Evolutionary Biology, University of Toronto, 25 Willcocks Street, Toronto,

6 Ontario, Canada M5S 3B2

7 <sup>2</sup> Department of Biological Sciences, University of Toronto Scarborough, 1265 Military Trail,

8 Scarborough, Ontario, Canada M1C 1A4

9 \* **Corresponding author:** [juan.vargassoto@mail.utoronto.ca](mailto:juan.vargassoto@mail.utoronto.ca)

10 **Running headline:** Estimating 3D animal density from remote detectors

11           **Abstract**

12           1.       Remote detectors are being used increasingly often to study aquatic and aerial species,  
13 for which movement is significantly different from terrestrial species. While terrestrial camera-trapping  
14 studies have shown that capture frequency, along with the species' movement speed and detector  
15 specifications can be used to estimate absolute densities, the approach has not yet been adapted to  
16 cases where movement occurs in three dimensions. Frameworks based on animal movement patterns  
17 allow estimating population density from camera-trapping data when animals are not individually  
18 distinguishable.

19           2.       Here we adapt one such framework to three-dimensional movement to characterize the  
20 relationship between population density, animal speed, characteristics of a remote sensor's detection  
21 zone, and detection frequency. The derivation involves defining the detection zone mathematically and  
22 calculating the mean area of the profile it presents to approaching individuals.

23           3.       We developed two variants of the model – one assuming random movement of all  
24 individuals, and one allowing for different probabilities for each approach direction (e.g. that animals  
25 more often swim/fly horizontally than vertically). We used computer simulations to evaluate model  
26 performance for a wide range of animal and detector densities. Simulations show that in ideal  
27 conditions the method approximates true density well, and that estimates become increasingly accurate  
28 using more detectors, or sampling for longer. Moreover, the method is robust to invalidation of  
29 assumptions, accuracy is decreased only in extreme cases where all detectors are facing the same way.

30           4.       We provide equations for estimating population density from detection frequency and  
31 outline how to estimate the necessary parameters. We discuss how environmental variables and  
32 species-specific characteristics affect parameter estimates and how to account for these differences in  
33 density estimations.

34           5.       Our method can be applied to common remote detection methods (cameras and  
35 acoustic detectors), which are currently being used to study a diversity of species and environments.  
36 Therefore, our work may significantly expand the number and diversity of species for which density can  
37 be estimated.

38   **Keywords**

39 3D movement, ideal gas model, population density, population surveys, random encounter model,  
40 remote detectors

41

## 42           **Introduction**

43           Remote detection methods like camera-traps originated for studying surface-dwelling species  
44 but are increasingly being used to study aquatic, arboreal, and airborne species. These technologies  
45 require considerably less effort and resources than alternatives like transects, particularly for long-term  
46 studies, and are less invasive. In aquatic studies, remote underwater video has allowed more efficient,  
47 extensive, and less biased sampling than diver-based surveys (King, George, Buckle, Novak, & Fulton,  
48 2018; Mallet & Pelletier, 2014). Similarly, acoustic detectors are becoming a more accessible and  
49 popular tool for studying and monitoring a variety of taxa such as birds (Blumstein et al., 2011; Celis-  
50 Murillo, Deppe, & Allen, 2009), echolocating bats (Marques et al., 2013), and even fishes that produce  
51 species-specific sounds, especially with the aid of automatic identification algorithms (Lindseth, Lobel,  
52 Lindseth, & Lobel, 2018). Camera-traps in turn have been useful to study the demographics of elusive  
53 species or to learn about biodiversity across different spatial scales (Ahumada et al., 2011; Barea-Azcón,  
54 Virgós, Ballesteros-Duperón, Moleón, & Chiroso, 2007; Karanth, Nichols, Kumar, & Hines, 2006). In  
55 every case, the technologies, software and analysis methods are constantly evolving (Burton 2015).

56           Two decades of theoretical developments have created a vast literature of methods for  
57 estimating the density of wild populations from camera-trapping data, and some of these methods can  
58 be adapted to other types of detectors. Mark-recapture methods, for example, have been used to study  
59 aquatic species with individually recognizable spots like whale sharks (*Rhincodon typus*) and eagle rays  
60 (Myliobatidae) (González-Ramos, Santos-Moreno, Rosas-Alquicira, & Fuentes-Mascorro, 2017; Meekan  
61 et al., 2006). However, most species lack individual markings and are therefore not amenable to these  
62 approaches (e.g., Karanth et al. 2006). For these species, existing frameworks for estimating density  
63 either provide relative estimates only [e.g. detection frequency, minimum number of detected  
64 individuals (Sherman, Chin, Heupel, & Simpfendorfer, 2018), maximum number of conspecifics in a  
65 single frame (Willis, Millar, & Babcock, 2000)], or make assumptions about how animals move for

66 estimating absolute density [e.g. movement around a home range centre (Campos-Candela, Palmer,  
67 Balle, & Alós, 2018), random walks (Nakashima, Fukasawa, & Samejima, 2018), ideal gas movement  
68 (Rowcliffe, Field, Turvey, & Carbone, 2008)]. These movement-based frameworks need to be adapted  
69 for key differences between terrestrial and aquatic or aerial species that perceive the world and move in  
70 three dimensions.

71 One approach for estimating population density when individuals cannot be distinguished is the  
72 Random Encounter Model (REM), formalized for encounters between animals and camera-traps by  
73 Rowcliffe et al. (2008). The model assumes that animals move like ideal gases (in straight lines, in  
74 random directions, with constant speed) and as a result the frequency at which a species is  
75 photographed by camera-traps (henceforth, “detection frequency”) scales positively with the number of  
76 individuals present in an area (i.e. population density), the species’ mean speed, and the size of the  
77 camera’s detection zone. This relationship can therefore be used to estimate density from the detection  
78 frequency. While this method requires more information about a study species than relative abundance  
79 measures, it considerably expands the number of species for which density can be estimated using  
80 camera-traps. The REM framework can be adapted to species that move in three dimensions rather than  
81 two, considering the three-dimensional shape and size of the detection zone.

82 Here, we present such an adaptation to estimate absolute density for aquatic species, using  
83 underwater cameras, and for birds and echolocating species, using acoustic sensors. Our adaptation  
84 substantially expands possibilities for estimating density from remote detection methods when species  
85 can be identified but individuals cannot. This method only requires the detection frequency of a species,  
86 information about the sensor’s detection zone, and an estimate of the species’ speed. We provide two  
87 alternatives; the first assumes completely random movement (within the specifications of the ideal gas  
88 framework, cf. below), while the second allows accounting for biases in movement direction (e.g. that  
89 fish more often swim parallel, rather than perpendicular, to the bottom). First, we will explain the

90 framework in detail, highlighting the importance of an accurate mathematical description of the  
91 detection zone. We will then develop the formulae for density for two types of detectors and test our  
92 estimator's performance using computer simulations.

## 93 **Materials and Methods**

### 94 1. Model Derivation

#### 95 1.1. The Random Encounter Model framework

96 The REM method for estimating density of unmarked animals from camera-trapping data is  
97 based on the idea that the encounter rate between a stationary detector and animals of a given species  
98 scales linearly with the species' density (see Hutchinson & Waser, 2007), with a scaling factor that  
99 depends on the species' movement characteristics and the detector's ability to record animals that are  
100 passing by at various distances (Rowcliffe et al., 2008). This relationship is summarized as:

$$111 \quad D = \frac{f}{\hat{p}\bar{v}} \quad (1)$$

101 where  $D$  is animal density,  $f$  is detection frequency, and  $\bar{v}$  is mean animal movement speed (See Table 1  
102 for description of parameters). The scaling constant  $\hat{p}$  can be thought of as the mean distance (in 2D) or  
103 area (in 3D) sampled instantaneously by the detector over all possible directions, and therefore depends  
104 on the sensor's technical specifications (opening angles and maximum detection distance) and on  
105 environmental variables (e.g. water clarity, foliage or clutter). Here, we will derive an equation for  $\hat{p}$  for  
106 the three-dimensional case. The main steps are 1) determining the shape of the detection zone, 2)  
107 describing it mathematically, and 3) calculating the mean area of its two-dimensional projection. The  
108 result is used directly in equation 1 to estimate density from capture frequency. We explain in more  
109 detail the projection of the detection zone in Section 2 and derive the density estimator in Section 3. We  
110 then test the performance of our estimator with computer-simulated capture data.

112 **Table 1. Parameters used in the derivation of the 3D random encounter method for estimating**  
 113 **animal densities.**

| Parameter                 | Description                                                                                                        |
|---------------------------|--------------------------------------------------------------------------------------------------------------------|
| $\hat{p}$                 | Mean area of the 2D projection of the 3D detection zone.                                                           |
| $S, S_i$                  | Surface area of the detection zone, and of its components $i$ .                                                    |
| $s$                       | Maximum distance from the detector at which animals can be detected                                                |
| $\phi$                    | Opening angle of the detector, corresponding to the diagonal field of vision in a camera.                          |
| $\kappa, \lambda, \gamma$ | Horizontal, vertical and diagonal fields of vision of a cropped (camera) detector.                                 |
| $\mu, \nu$                | Opening angles of the disc sectors that make up the sides of a camera's detection zone                             |
| $\omega, \theta$          | Angles describing the direction of an animal approaching the detection zone, relative to the detector's direction. |
| $D$                       | Population density [animals per unit volume]                                                                       |
| $\bar{v}$                 | Mean movement speed of the study species                                                                           |
| $f$                       | Detection frequency: the number of independent recordings of a species by a detector, divided by deployment time   |

114

115 1.2. Profile of the detection zone, extension from 2D to 3D

116 For terrestrial camera-traps, where animals move in two dimensions only,  $\hat{p}$  in equation 1 is the  
 117 mean profile width of the camera's detection zone, as presented to approaching animals. Given the  
 118 shape of the detection zone, the profile width depends on the direction of approach (Fig. 1). While not  
 119 explicitly stated by Rowcliffe *et al.* (2008), the "profile" is the projection of the detection zone onto a  
 120 line perpendicular to the direction of approach. One can therefore use Cauchy's surface area theorem  
 121 (Cauchy, 1841) to calculate the mean profile width. This theorem states that the average projected area  
 122 of a convex body is proportional to its surface area. The mean profile width of the two-dimensional  
 123 detection zone is its perimeter  $P$  multiplied by a constant:

124 
$$\hat{p} = \frac{1}{\pi} P \quad (2)$$

125 which is the same as equation 2 in Rowcliffe et al. (2008). The theorem can readily be applied to  
126 determine the mean profile of a three-dimensional detection zone.

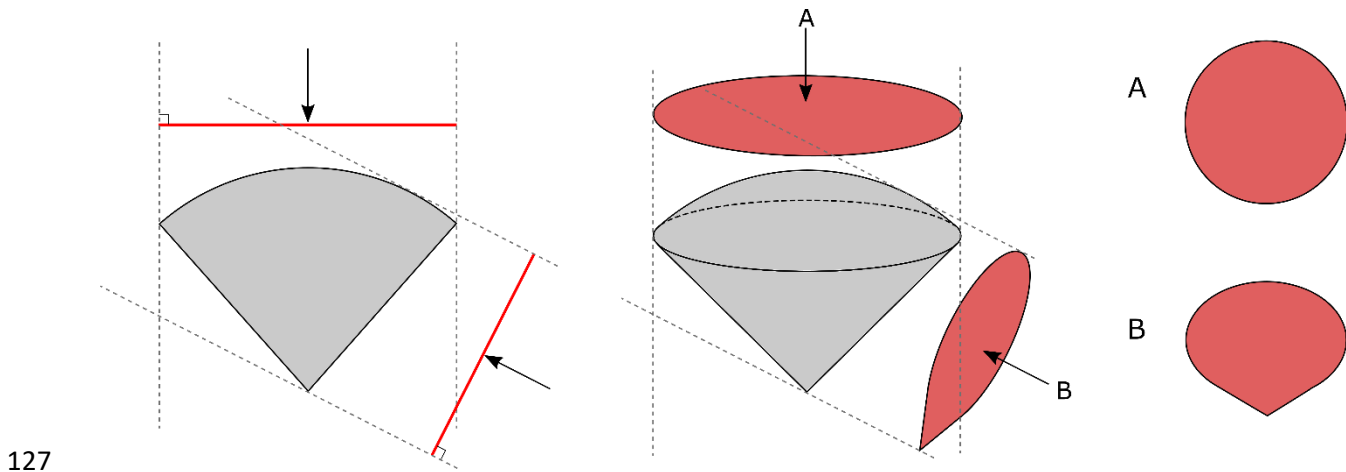

128 **Figure 1. The different profiles presented by the detection zone of a remote detector to an approaching animal**  
129 **in two (left) or three dimensions (center). In 2D, profiles are lines, while in 3D they are surfaces. The silhouettes**  
130 **A and B (right) show the profiles presented to individuals approaching from directions A and B, respectively.**

131

132

133 In the case of a three-dimensional detection zone, equation (1) still holds, with the difference  
134 that  $\hat{p}$  corresponds to an area instead of a length. This area is nonetheless the projection of the  
135 detection zone onto a lower-dimensional object, i.e. onto a plane. According to Cauchy's theorem, the  
136 mean projected area of a three-dimensional object is obtained from the surface area  $S$  as:

137 
$$\hat{p} = \frac{1}{4} S \quad (3)$$

138 (Cauchy, 1841; Vouk, 1948). To calculate  $S$ , we will define the detection zone for two types of sensors: a  
139 generic sensor with a conical detection zone (acoustic detectors), and the special case of a sensor with a  
140 cropped image (i.e. cameras). For acoustic detectors we also determined how to calculate density when



141 there is bias in directions of approach relative to the direction of the detector, for example bats flying  
142 most frequently horizontally into a detection zone facing up.

143

## 144 2. Definition of the detection zone

145 A remote detector's detection zone is generally determined by two parameters: detection angle  
146 and maximum distance from which a signal is detectable. Geometrically, this translates into a cone with  
147 a convex base. Acoustic detectors report signals no matter where in this zone they occur, but for  
148 cameras some near-boundary signals are lost when images are cropped to a rectangular frame. As such,  
149 acoustic detectors have the full "conical-with-hat-shaped" detection zone (Fig. 2A), whereas cameras  
150 have a subset of this region defined by the horizontal and vertical angles of view (Fig. 2D). In Section 3.1,  
151 we derive expressions to calculate the surface area for both detector types and use Cauchy's theorem to  
152 calculate the respective mean profile area. This method applies if we assume that all directions of  
153 approach are equally likely. In section 3.2, we relax this assumption and consider potential biases in the  
154 direction of approach.

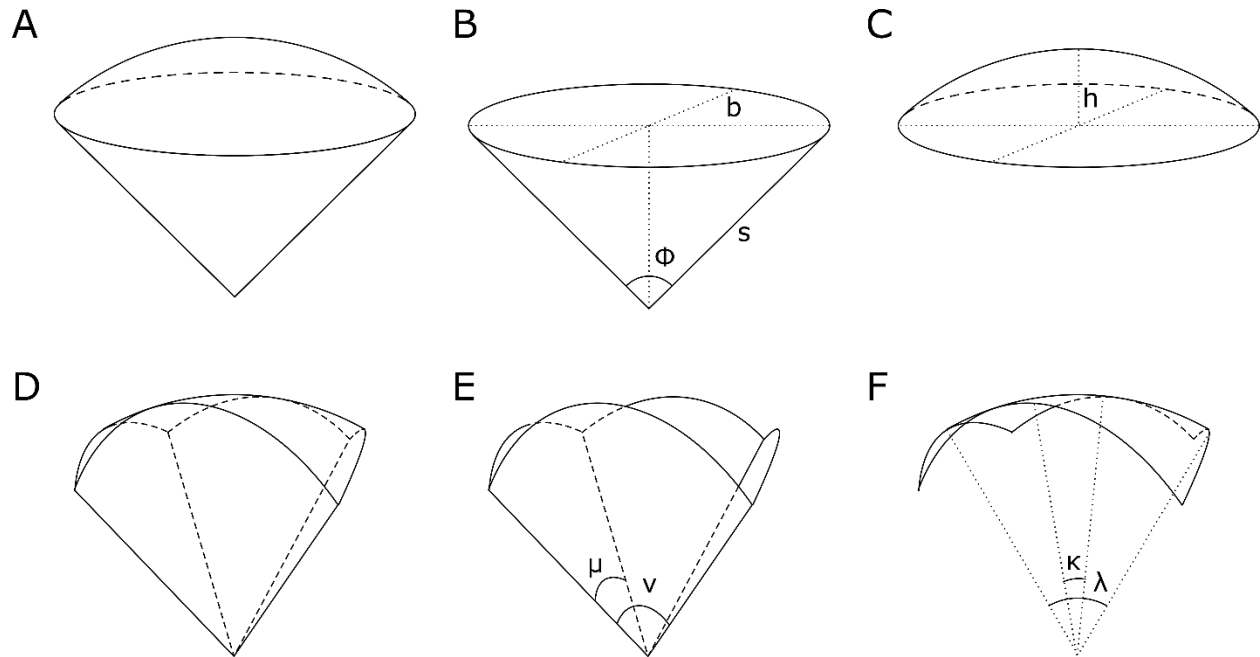

155

156 **Figure 2. Perspective of the detection zone of (A) an acoustic detector and (D) a camera, where the image is**  
 157 **cropped into a rectangle. We decomposed both types of detection zone into bottom and top sections to**  
 158 **calculate their surface areas: for acoustic detectors, we considered the lateral surface area  $S_S$  of a cone (B), and**  
 159 **the area  $S_C$  of a spherical cap (C); for cameras, we considered the surface area  $S_L$  of four disc segments (E) and**  
 160 **the area  $S_R$  of a spherical rectangle (F). Parameters are  $\phi$ : opening angle of the detector,  $s$ : slant height of cone,**  
 161  **$b$ : basal radius of the cone,  $h$ : height of the spherical cap,  $\mu$  and  $\nu$ : angles of the disc segments that make up the**  
 162 **sides of the cropped detection zone,  $\kappa$  and  $\lambda$ : horizontal and vertical fields of vision of the camera**

163

## 164 2.1. Uniformly distributed approach directions

165 To calculate the surface area of an acoustic sensor's detection zone, we divide the detection  
 166 zone into two components: a conic base (Fig. 2B) and a spherical cap (Fig. 2C). The lateral surface area of  
 167 the cone is calculated from the slant height,  $s$  (i.e. the maximum detection distance), and the cone's  
 168 basal radius,  $b$ , as:

169

$$S_C = \pi bs$$

$$S_C = \pi s^2 \sin \frac{\phi}{2} \quad (4)$$

170 where  $\phi$  is the detector's opening angle. The spherical cap's surface area is  $S_S = 2\pi sh$  (Kern & Bland,  
171 1938), where  $h$  is the cap's height, given by  $h = s(1 - \cos \frac{\phi}{2})$  (Appendix A1), so:

172

$$S_S = 2\pi s^2 \left(1 - \cos \frac{\phi}{2}\right) \quad (5)$$

173 Combining equations (4) – (5), we obtain the mean profile area of an acoustic detector's detection zone:

174

$$\widehat{p}_{ad} = \frac{1}{4}(S_C + S_S)$$

175

$$\widehat{p}_{ad} = \frac{1}{4} \left( \pi s^2 \sin \frac{\phi}{2} + 2\pi s^2 \left(1 - \cos \frac{\phi}{2}\right) \right)$$

176

$$\widehat{p}_{ad} = \frac{1}{4} \pi s^2 \left( 2 - 2 \cos \frac{\phi}{2} + \sin \frac{\phi}{2} \right) \quad (6)$$

177 Cauchy's theorem is only valid for convex bodies, so equation 6 only applies when the detection  
178 angle is smaller than  $\pi$  (180°) or equal to  $2\pi$  (360°). The latter occurs when signals can be detected from  
179 any direction, as is the case with omnidirectional microphones. Consider for example an acoustic  
180 detector with a detection angle of 90° ( $\pi/2$  rad) that can detect signals from 10 meters away.  
181 Substituting  $s$  and  $\phi$  in eq. 6 we obtain:

182

$$\widehat{p}_{ad} = \frac{1}{4} \pi \times 10^2 \left( 2 - 2 \cos \left( \frac{1}{2} \times \frac{\pi}{2} \right) + \sin \left( \frac{1}{2} \times \frac{\pi}{2} \right) \right)$$

183

$$\widehat{p}_{ad} = 101.5 \text{ m}^2$$

184 To calculate the surface area of a camera's detection zone, we note that image cropping creates  
185 a detection zone bounded by a spherical rectangle cap sitting atop two pairs of disc sectors of radius  $s$   
186 and delimited by angles  $\mu$  and  $\nu$  (Fig. 2D). These angles are related to the vertical ( $\lambda$ ), horizontal ( $\kappa$ ), and  
187 diagonal ( $\gamma$ ) fields of vision of the camera, of which at least one is normally provided by the

188 manufacturer (see Appendix A3 for how to calculate the unknown angles). As the surface areas of the  
 189 disc sectors are given by  $S_\nu = \pi s^2 \frac{\nu}{2\pi}$  or  $S_\mu = \pi s^2 \frac{\mu}{2\pi}$ , respectively, the total lateral surface area of the  
 190 camera's detection zone,  $S_L$  (Fig. 1E), becomes

$$191 \quad S_L = 2S_\nu + 2S_\mu = s^2(\mu + \nu) \quad (7)$$

192 Furthermore, the surface area of the spherical rectangle cap,  $S_R$  (Fig. 1F), is obtained by multiplying the  
 193 surface area of a sphere of radius  $s$  by the proportion of the sphere occupied by the spherical rectangle:

$$194 \quad S_R = 4\pi s^2 \frac{\Omega}{4\pi}$$

$$195 \quad = s^2\Omega \quad (8)$$

196 where  $\Omega$  is the solid angle delimited by the horizontal and vertical fields of vision,  $\kappa$  and  $\lambda$ , given by  
 197 (Appendix A2):

$$198 \quad \Omega = 4 \arcsin \frac{\tan \frac{\kappa}{2} \tan \frac{\lambda}{2}}{\sqrt{1 + \tan^2 \frac{\kappa}{2}} \sqrt{1 + \tan^2 \frac{\lambda}{2}}} \quad (9)$$

199 The mean profile area for a camera is therefore:

$$\widehat{p}_{cam} = \frac{1}{4}(S_L + S_R)$$

$$200 \quad \widehat{p}_{cam} = \frac{1}{4} \left( s^2(\mu + \nu) + 4s^2 \arcsin \frac{\tan \frac{\kappa}{2} \tan \frac{\lambda}{2}}{\sqrt{1 + \tan^2 \frac{\kappa}{2}} \sqrt{1 + \tan^2 \frac{\lambda}{2}}} \right)$$

$$\widehat{p}_{cam} = \frac{1}{4} s^2 \left( \mu + \nu + 4 \arcsin \frac{\tan \frac{\kappa}{2} \tan \frac{\lambda}{2}}{\sqrt{1 + \tan^2 \frac{\kappa}{2}} \sqrt{1 + \tan^2 \frac{\lambda}{2}}} \right) \quad (10)$$

201 Consider for example an underwater camera with horizontal and vertical fields of vision (FOV) of  
 202 122.6° (2.1 rad) and 94.4° (1.6 rad), respectively (these correspond to a GoPro Hero 7 using a wide 4:3

203 aspect ratio). Using eq. S3.2 we obtain a diagonal FOV of  $154.5^\circ$  (2.7 rad) and using eq. S3.4 we obtain  
204 the lateral angles  $\mu = 142.1^\circ = 2.5$  rad and  $\nu = 125.2^\circ = 2.2$  rad. Substituting these values in eq. 10,  
205 assuming again a detection distance of 10 m, we obtain the mean profile area for this camera:

$$206 \quad \widehat{p}_{cam} = \frac{1}{4} \times 10^2 \left( 2.5 + 2.2 + 4 \arcsin \frac{\tan \frac{2.1}{2} \tan \frac{1.6}{2}}{\sqrt{1 + \tan^2 \frac{2.1}{2}} \sqrt{1 + \tan^2 \frac{1.6}{2}}} \right)$$

$$207 \quad \widehat{p}_{cam} = 186.6 \text{ m}^2$$

## 208 2.2. Bias in direction of movement

209 The method described above for calculating the detection zone's mean profile area  $\hat{p}$  assumes  
210 that every direction of approach is equally likely. However, some angles of approach could occur more  
211 frequently than others depending both on the study species and the placement and orientation of the  
212 detector. Picture, for example, fish moving in a stream in the direction of the current. The profile  
213 presented to all of them by a camera is the same and the effective mean profile area is greater or lower  
214 than the expected mean profile area, depending on which way the detector is facing. To account for  
215 these biases, we derive formulae to calculate the detection zone's projected area  $p$  for any direction of  
216 approach and then weight these according to the probability of approach directions. As these  
217 calculations quickly become lengthy and complicated, we here summarize the approach for acoustic  
218 detectors and provide detailed calculations in Appendix A4.

219 The mean profile area is given by:

$$220 \quad \hat{p} = \frac{1}{\pi} \int_0^\pi P(\omega) p(\omega) d\omega \quad (11)$$

221 where  $P(\omega)$  is the probability that an individual approaches the detector at angle  $\omega$ , and  $p(\omega)$  gives the  
222 profile area corresponding to that direction. Depending on  $\omega$  – the angle relative to the direction of the

223 detector – the different components of the detection zone may be visible or hidden. We obtain

224 therefore four different formulae to calculate  $p(\omega)$ :

$$225 \quad p(\omega) = \begin{cases} a_e, & \sin \omega \leq \sin \frac{\phi}{2} \text{ and } \sin \omega \leq \cos \frac{\phi}{2} \\ a_e + a_d, & \sin \omega \leq \sin \frac{\phi}{2} \text{ and } \sin \omega > \cos \frac{\phi}{2} \\ a_e + a_h, & \sin \omega > \sin \frac{\phi}{2} \text{ and } \sin \omega \leq \cos \frac{\phi}{2} \\ a_e + a_d + a_h, & \sin \omega > \sin \frac{\phi}{2} \text{ and } \sin \omega > \cos \frac{\phi}{2} \end{cases} \quad (12)$$

226 The first element,  $a_e$ , corresponds to the area of the projection encompassed by the base of the cone

227 (area I in Fig. 3), while the areas  $a_h$  and  $a_d$  are the projections of the visible parts of the spherical cap

228 (area II) and the cone (area III). The derivation of  $a_e$ ,  $a_h$ ,  $a_d$ , and the rationale behind them are given in

229 Appendix A4.

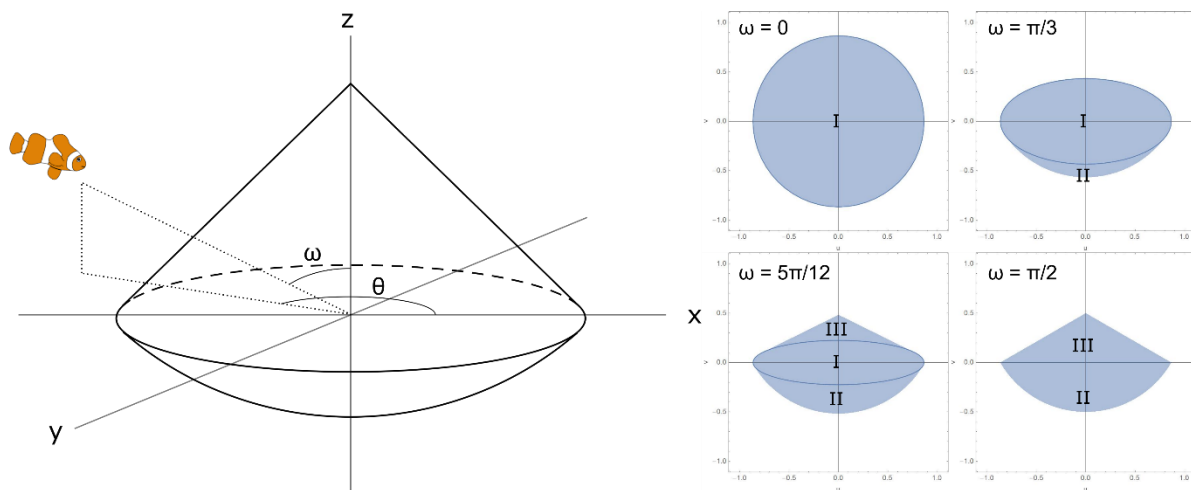

230

231 **Figure 3. Perspective of a conic detection zone (left), showing the angles  $\omega$  and  $\theta$  that define the direction of**

232 **approach of an individual. Different angles  $\omega$  result in different profiles (right). The labels indicate the different**

233 **areas that need to be calculated in each case; I is the area of the projection encompassed by the circle at the**

234 **base of the cone, II is the projection of the spherical cap, III is the projection of the cone's sides.**

235

### 236 3. Simulation tests

237 We tested the formula for estimating density from detection frequency using computer  
238 simulations. Firstly, these serve to confirm that the method performs well under ideal conditions (i.e.  
239 when all model assumptions are met and perfect information about the species' movement is available)  
240 and secondly to test the robustness to invalidation of assumptions. The assumptions regarding animal  
241 movement are those of the ideal gas model: individuals moving in a straight line, in random directions,  
242 and at a constant speed. We assumed perfect detection and an exact knowledge of the detection  
243 distance and opening angle and evaluated the method's performance for a range of animal densities  
244 and detector numbers. Furthermore, to determine the robustness of our method, we evaluated its  
245 performance for the following scenarios: (i) allowing variation in speed by randomly selecting different  
246 individual speeds; (ii) allowing a non-random distribution of approach directions by randomly selecting  
247 individual 'tilt' angles, combined with realistic scenarios of detector placement and orientation.

248 We set up the simulation as follows: Individuals were distributed at random locations within a  
249 cube of side 10, and each one was assigned a random direction ( $x, y, z$  vector components drawn from a  
250 uniform distribution from -1 to 1). All individuals moved at the same speed and bounced back into the  
251 cube if they reached the reflective boundaries. We tested the density estimator for a range of densities  
252 between 0.1 and 10  $\text{ind.}\mu\text{v}^{-1}$  (individuals per unit volume), i.e. between 100 and 10000 individuals.

253 We placed between 5 and 25 detectors facing in random directions at random locations within  
254 the 'sampling zone', a cube of side 4 situated at the centre of the larger cube. We set a detection  
255 distance of 0.5  $\mu\text{d}$  (unit distance) and a detection angle of  $45^\circ$ , which yields a mean profile area of 0.105  
256  $\mu\text{a}$  (unit area) (equation 6).

257 We set movement speed equal to one length of the detection radius per time step and ran each  
258 simulation for 40 steps. We counted an encounter whenever an individual entered a detection zone.

259 Thus, we obtained for each step and each detector the total number of detections up to that time point.  
260 We calculated the detection frequency  $f$  by dividing this cumulative count by the number of steps and  
261 then divided  $f$  by the mean profile area and the movement speed to estimate density (eq. 1). We  
262 recorded the mean estimated density across all detectors at every time step. We also determined how  
263 performance changed with effort both in terms of the number of detectors and sampling time.

264 To test how variability in speed among individuals affected density estimates, we ran  
265 simulations assigning each individual a speed drawn at random from a normal distribution with mean  
266 0.5 ud/step, and with standard deviation between 0 and 0.1 ud/step. Similarly, to determine the effect  
267 of having biased movement directions, we drew the vertical ( $z$ ) component of the individual direction  
268 vectors from a truncated normal distribution centred around 0 and bounded between -1 and 1, so that  
269 most individuals would move near horizontally. We assessed the effect of this bias on the performance  
270 of the estimator for several scenarios of detector distribution (regular spacing of detectors in 2D on a  
271 plane, regular spacing in 3D throughout the sampling cube, random distribution in 3D) and orientation  
272 (all horizontal, all vertical, random). These simulations were run with ten detectors.

273 We iterated each scenario 100 times, and assessed model performance by calculating the bias,  
274 precision and accuracy of the density estimate relative to the real density at the end of each simulation.  
275 We used the scaled mean error (SME), the coefficient of variation (CV) and the scaled mean square error  
276 (SMSE) as indicators of bias, precision, and accuracy, respectively:

277 
$$SME = \frac{1}{An} \sum_{j=1}^n (E_j - A)$$

278 
$$CV = \frac{SD}{\bar{E}}$$

279 
$$SMSE = \frac{1}{A^2n} \sum_{j=1}^n (E_j - A)^2$$



280 where  $\bar{E}$  is the mean density estimate,  $E_j$  is the density estimate of the  $j^{\text{th}}$  iteration, SD is the standard  
281 deviation of density estimates across iterations,  $A$  is the real density, and  $n$  is the number of iterations  
282 (Walther & Moore, 2005). The bias metric SME indicates whether the true value is over- or  
283 underestimated, the precision metric CV indicates the variability among estimates, and the accuracy  
284 metric SMSE measures both bias and precision in a single index. The closer to zero each index is, the  
285 better the performance of the estimator.

286

## 287 **Results**

288 Simulations show that, under ideal conditions, the estimated density closely approximates the  
289 real density. Regardless of the number of detectors used, the estimate density was within 5% of the real  
290 value at the end of each simulation (Fig. 4A), and the standard deviation was no larger than 30% of the  
291 mean estimate (Fig. 4B). The overall performance of the method nonetheless depended on sampling  
292 effort, both in terms of the number of detectors and the sampling time. The lowest number of detectors  
293 yielded the greatest bias and the lowest precision and accuracy, and all indices improved substantially  
294 with the deployment of additional detectors (Fig. 4A-C). Moreover, bias also decreases, and precision  
295 and accuracy increase, as sampling time increases (Fig. 4D-F), meaning that in real-life applications a low  
296 availability of detectors could at least be partially compensated for by longer sampling times.

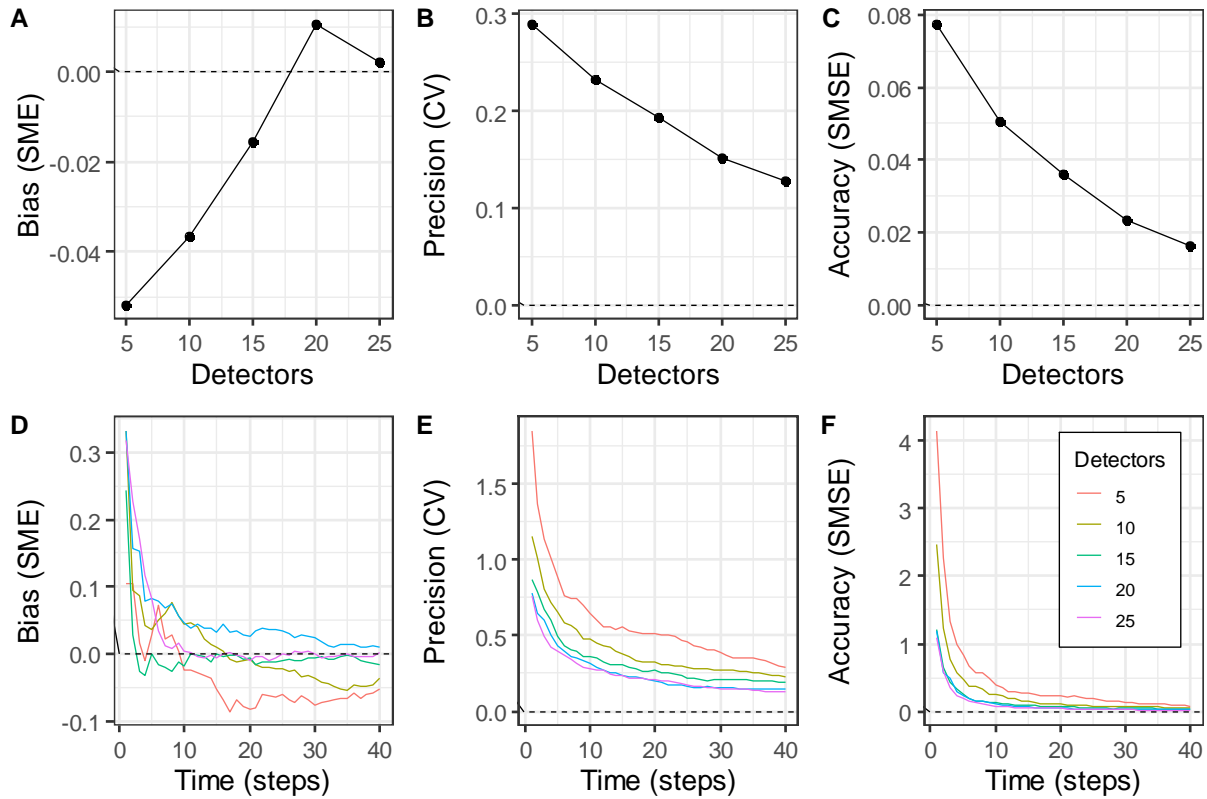

297

298 **Figure 4. Performance of the 3D density estimation method for different levels of effort. The top row shows the**  
299 **mean bias, precision, and accuracy metric values at the end of the simulations as a function of the number of**  
300 **detectors deployed. The bottom row shows the change in these metrics as time progresses in the simulation.**

301

302 The real density did not seem to bias the estimator, except at extremely low densities (Fig. 5A). Precision  
303 (Fig. 5B), and thus overall accuracy (Fig. 5C), however, depended strongly on the population's density,  
304 with the estimator's CV decreasing by a factor of more than 9 between the lowest ( $0.1 \text{ ind.}\mu\text{v}^{-1}$ ) and

305 highest (10 ind. $\cdot$ uv $^{-1}$ ) densities considered.

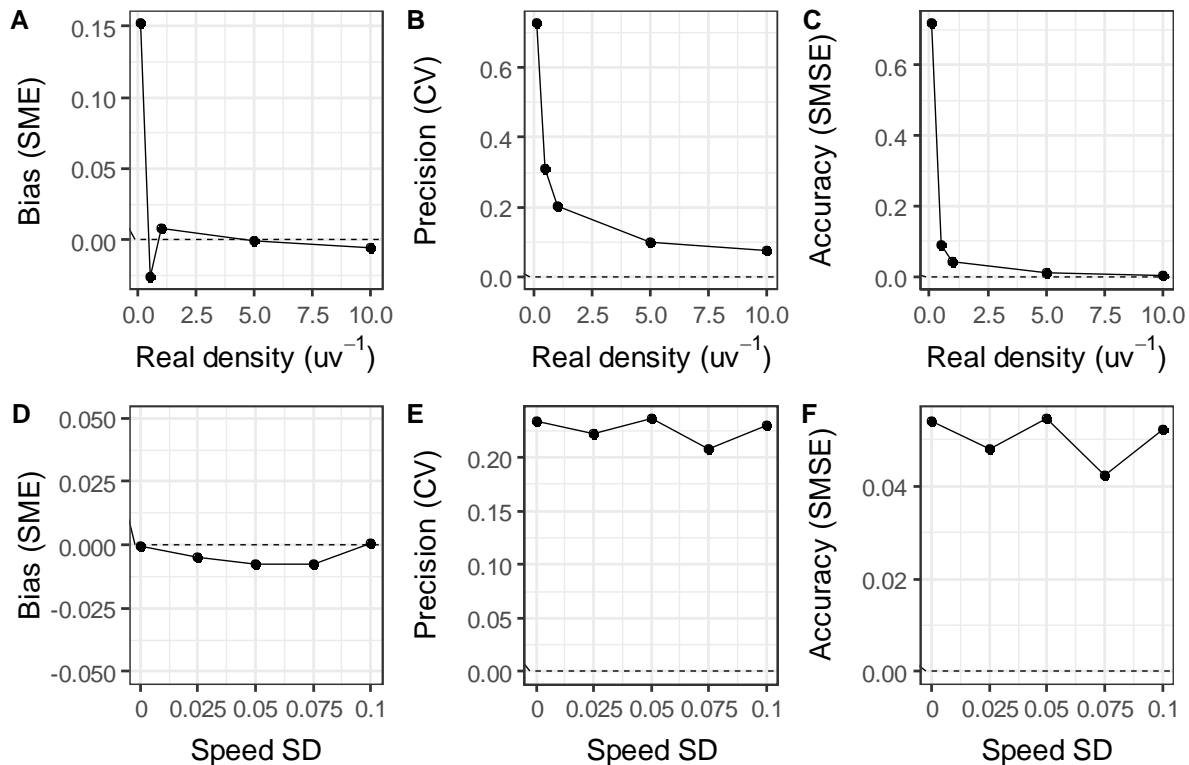

306

307 **Figure 5. Effects of population density (top row), and among-individual variability in movement speed (bottom**  
308 **row) on the performance of the 3D density estimation method. All parameters were as described in the text,**  
309 **using in particular a constant mean speed of 0.5 ud/step in the top row, and varying the speed among**  
310 **individuals by drawing from a normal distribution with standard deviation between 0 and 0.1 ud in the bottom**  
311 **row.**

312

313 The simplifying assumption of equal movement speeds among individuals appears to be robust,  
314 as introducing among-individual variance in speed did not noticeably affect the estimator's bias,  
315 precision, or accuracy (Figs. 5D-F).

316 Having biases in the direction of movement, however, did decrease performance in some scenarios,

317 particularly when all individuals were moving horizontally, i.e. with a standard deviation of zero around

318 the mean direction. In this case, precision and accuracy decreased when detectors were placed on a  
 319 single plane and oriented vertically (Fig. 6D, G) or horizontally (Fig. 6E, H). Conversely, detectors  
 320 distributed regularly or randomly across the 3D space yielded similar accuracy and precision estimates  
 321 for all cases of movement direction bias. Nevertheless, there was virtually equal performance regardless  
 322 of detector placement when detectors faced in random directions (Fig. 6F, I). Moreover, the random  
 323 orientation of detectors also generally lowered the estimator's bias compared to the scenarios where all  
 324 detectors were facing vertically or horizontally (contrast Figs. 6A-C).

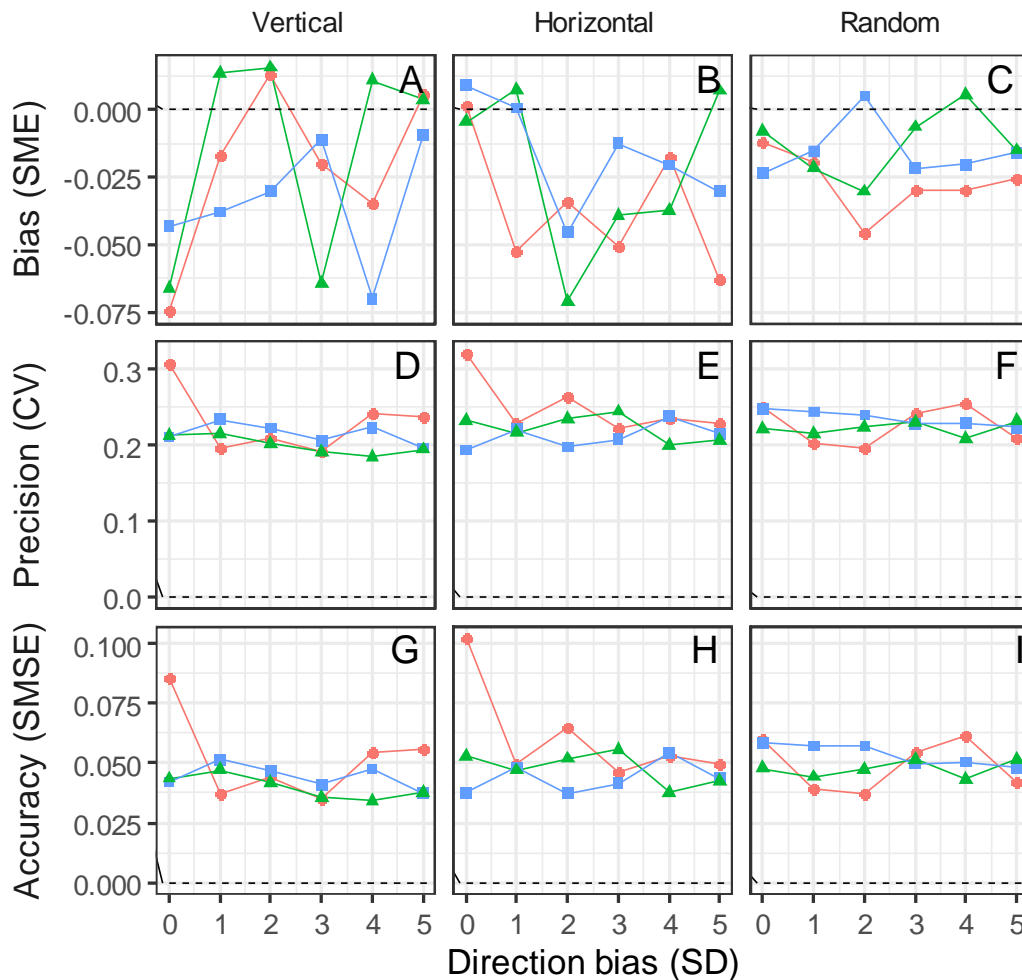

325  
 326 **Figure 6. Effects of sampling strategies and animal movement bias on the performance of the 3D**  
 327 **density estimation method. Columns represent the orientation of detectors: all vertical (left), all horizontal**

328 **(middle) or all random (right). Symbols show the distribution of detectors: regular spacing on a 2D plane**  
329 **(circles), regular spacing in 3D throughout the sampling cube (triangles), and random distribution in 3D**  
330 **(squares). Parameters are as described in the text, using in particular a vertical direction component drawn at**  
331 **random from a truncated normal distribution centred at 0 with standard deviations between 0 and 5 to show**  
332 **direction bias.**

333

### 334 **Discussion**

335 We have outlined a method to use remote detectors such as underwater cameras or acoustic  
336 sensors to estimate population density from an encounter rate. The underlying random encounter  
337 model was originally proposed and tested as a density estimator for species moving in a two-  
338 dimensional terrestrial environment by Rowcliffe et al. (2008), and our calculations now allow its  
339 adaptation to species that move in three dimensions such as fishes, birds and bats. The basic  
340 requirements regarding detector specifications and information on movement speed remain the same  
341 as for the two-dimensional case.

342 Simulations show good performance of the estimator, low levels of bias, and a high degree of  
343 precision. Such consistent performance was expected when all assumptions were met, which may not  
344 be the case in real-life applications. We showed, however, that the method is robust to violations of  
345 assumptions. There was very little effect of increased variance in speed among individuals, or of bias in  
346 direction. Furthermore, our simulation results suggest that any effect could be limited or altogether  
347 eliminated simply by orienting detectors in different directions, even when detectors are placed on a  
348 single plane (on the ground, for example).

349 Performance is significantly influenced by sampling effort as it relates to the real density, in  
350 terms of both time and number of detectors. At low densities especially, insufficient effort could result

351 in an over- or underestimation of density. An advantage of using a method based on movement models  
352 is that researchers can use the same framework to calculate the effort needed beforehand. Rearranging  
353 eq. 1 and substituting density and speed with prior information allows calculating an expected capture  
354 frequency. We saw no bias at higher densities, but we expect that in practice extremely high densities  
355 (e.g. in fish schools) may prevent properly counting individuals, resulting in underestimated densities. In  
356 these cases, researchers could first estimate a density of groups and obtain overall density by  
357 multiplying this estimate by an independently calculated mean group size (Rowcliffe et al. 2008).

358 Our method can be applied in cases where a lack of individual markings impedes the use of  
359 mark-recapture techniques. It is also an improvement over indices of relative abundance such as the  
360 maximum or mean number of conspecifics in a single frame (Schobernd, Bacheler, & Conn, 2014;  
361 Sherman et al., 2018). These metrics are commonly used to analyse footage from baited-remote-  
362 underwater-video-stations (BRUVS), but can underestimate true abundance (Cappo, Harvey, Malcolm, &  
363 Speare, 2003; Stobart et al., 2015). We know of no similar tools to estimate abundance from acoustic  
364 detectors. These sensors allow to identify species and count passages through the detection zone, so  
365 our method is also applicable with these technologies, provided the detection zone and mean species  
366 speed can be accurately measured.

367 For many species, mean speed will not be immediately available in the literature but could be  
368 approximated with additional measurements. For example, using two cameras in a stereo arrangement,  
369 the footage from both could be used to estimate speed (Somerton, Williams, & Campbell, 2017;  
370 Williams, Rooper, & Towler, 2010) and – using only one of the two cameras – population density in the  
371 same study.. Movement If detectors are deployed for several days the estimation of mean speed must  
372 include periods of inactivity (see Carbone, Cowlshaw, Isaac, & Rowcliffe, 2005). Ideally, surveys should  
373 be conducted at the same time of day when working in different sites, during the species' daily activity  
374 peak.

375 Additional to speed, an exact characterization of the detection zone is required to estimate  
376 density accurately. This zone is determined first by the opening angle (for acoustic detectors), or the  
377 horizontal and vertical fields of vision (for cameras), usually given by the manufacturer. However, action  
378 cameras commonly used in remote underwater surveys have wide-angle lenses, which distort the  
379 image. Because of this, the diagonal field of vision will not correspond to the angle calculated assuming  
380 a rectilinear lens (see Appendix A3). The additional area in the projection due to the distortion should be  
381 small, so we suggest assuming a rectilinear lens for consistency.

382 The second element needed to characterize the detection zone is the detection radius. Unlike  
383 the opening angles the detection radius is influenced by environmental variables. For example, for  
384 underwater cameras, detection distance depends on visibility (i.e. turbidity), which should be  
385 considered when comparing densities across sites. Similarly, for acoustic detectors, atmospheric  
386 conditions like temperature and humidity affect how far an acoustic signal travels, effectively influencing  
387 the detection distance for birds and bats (Lawrence & Simmons, 1982; Snell-Rood, 2012). In both  
388 aquatic and aerial surveys, physical obstacles such as vegetation will also limit detectability; for instance,  
389 detection of bats with low-frequency calls (25 kHz) is significantly hindered by habitat structure  
390 (Patriquin, Hogberg, Chruszcz, Barclay, & Barclay, 2003; Weller & Zabel, 2002).

391 Environmental variables also interact with species-specific traits, generating different detection  
392 distances even under comparable environmental conditions. For example, cameras can detect larger  
393 species further than smaller species, and acoustic detectors will detect species with lower frequency or  
394 more intense calls at greater distances from than species with high-frequency calls (Jakobsen, Brinkløv,  
395 & Surlykke, 2013; Lawrence & Simmons, 1982; Snell-Rood, 2012; Surlykke & Kalko, 2008). Given the  
396 multiple factors that influence detection distance, we suggest an ad-hoc calculation for every system, for  
397 example placing a model of the study species progressively further from a camera until it is no longer  
398 recognizable. With acoustic detectors the same can be done using a speaker at a range of distances.

399 Our calculations are performed for individual detectors, but, as our simulations show, the best  
400 results are obtained when averaging across multiple detectors. Improved performance using more  
401 detectors is to be expected, as averaging across detectors minimizes possible sampling errors (Rowcliffe  
402 et al., 2008). Using more detectors also reduced variability across trials, implying that less effort is  
403 required to obtain accurate density estimates. Sampling designs should seek to maximize the number of  
404 encounters with a target species. using a number and spacing of detectors that capture the movement  
405 of the species of interest, while maintaining independence across detectors (Keiter et al., 2017).

406 Finally, we note that detection zones can also be affected by placement. Cameras placed in  
407 shallow streams, for example, could have their detection zone cut at the top by the surface and at the  
408 bottom by the substrate. In these cases, the resulting video frames can be cropped so that neither the  
409 ground nor the surface are visible, and the fields of vision and capture frequency recalculated  
410 accordingly (this would be equivalent to having a camera with narrower field of vision). If topography  
411 permits, one can prevent the issue of an incomplete detection zone by placing the camera in mid-water  
412 such that neither the water surface nor the bottom are visible. This would be a departure from current  
413 designs that set cameras on the ground but would avoid the issue of cropping the detection zone. For  
414 benthic species or very shallow streams none of these solutions might be feasible, and we would  
415 recommend using a 2D approach.

416 In summary, we have proposed a method for estimating density in three dimensions using data  
417 from remote detectors, which can be used in ecological and conservation research and as a monitoring  
418 tool. The description of detection zones provided will be useful in translating other density estimation  
419 methods that are also based on the ideal gas model (Campos-Candela et al., 2018; Moeller, Lukacs, &  
420 Horne, 2018). There is an extensive and growing literature characterizing sampling requirements for  
421 camera-traps in two dimensions, but such considerations are practically non-existent for species moving  
422 in three dimensions (Burton et al., 2015; O'Connell, Nichols, & Karanth, 2010). Our analyses allow



423 extending these considerations to three dimensions, and it is our hope that our work will prompt new  
424 study designs and applications of remote detection methods to study a broader range of species and  
425 environments. We lay out the theoretical foundation of the method but recognize that it will require  
426 empirical validation. The sampling of aquatic, airborne, and arboreal species each comes with intrinsic  
427 challenges and field trials must be conducted to confirm that the method performs in real conditions as  
428 well as predicted by simulations. Given the existing camera-trapping literature and the use of  
429 underwater cameras to estimate abundance, we believe the application of our method will be more  
430 straightforward in underwater censuses. The application to acoustic detectors will require further work  
431 to characterize the detection zone, as currently there is no quantitative way to measure the detection  
432 distance under different environmental conditions. Thus, the requirements of our method open new  
433 avenues of research in remote detection.

434           **Acknowledgments**

435           PKM is grateful for support from an NSERC (Natural Sciences and Engineering Research Council  
436 of Canada) Discovery Grant, CFI (Canada Foundation for Innovation) John R. Evans Leader Funds, and  
437 MRIS Ontario Research Funds. Funding by FRQNT (Fonds de recherche nature et technologie) to RAC  
438 and an NSERC Discovery Grant to NEM is gratefully acknowledged.

439           **Authors' contributions**

440           RAC, PKM and JSVS conceived the original concept. JSVS and PKM derived the equations. JSVS  
441 conducted simulations and led the writing of the manuscript. All authors contributed critically to the  
442 drafts and gave final approval for publication.

443           **Data accessibility**

444           The code for the simulations and to reproduce figures is available on github in the following  
445 repository: `juansvs/3D_DensityEstimation`

446

447 **References**

- 448 Ahumada, J. A., Silva, C. E. F., Gajapersad, K., Hallam, C., Hurtado, J., Martin, E., ... Andelman, S. J. (2011).  
449 Community structure and diversity of tropical forest mammals: data from a global camera trap  
450 network. *Philosophical Transactions of the Royal Society of London. Series B, Biological Sciences*,  
451 *366*(1578), 2703–11. doi:10.1098/rstb.2011.0115
- 452 Barea-Azcón, J. M., Virgós, E., Ballesteros-Duperón, E., Moleón, M., & Chiroso, M. (2007). Surveying  
453 carnivores at large spatial scales: a comparison of four broad-applied methods. *Biodiversity and*  
454 *Conservation*, *16*(4), 1213–1230. doi:10.1007/s10531-006-9114-x
- 455 Blumstein, D. T., Mennill, D. J., Clemins, P., Girod, L., Yao, K., Patricelli, G., ... Kirschel, A. N. G. (2011).  
456 Acoustic monitoring in terrestrial environments using microphone arrays: applications,  
457 technological considerations and prospectus. *Journal of Applied Ecology*, *48*, 758–767.  
458 doi:10.1111/j.1365-2664.2011.01993.x
- 459 Burton, A. C., Neilson, E., Moreira, D., Ladle, A., Steenweg, R., Fisher, J. T., ... Boutin, S. (2015). REVIEW:  
460 Wildlife camera trapping: a review and recommendations for linking surveys to ecological  
461 processes. *Journal of Applied Ecology*, *52*(3), 675–685. doi:10.1111/1365-2664.12432
- 462 Campos-Candela, A., Palmer, M., Balle, S., & Alós, J. (2018). A camera-based method for estimating  
463 absolute density in animals displaying home range behaviour. *Journal of Animal Ecology*, *87*(3),  
464 825–837. doi:10.1111/1365-2656.12787
- 465 Cappo, M., Harvey, E., Malcolm, H., & Speare, P. (2003). Potential of video techniques to monitor  
466 diversity, abundance and size of fish in studies of marine protected areas. University of  
467 Queensland.
- 468 Carbone, C., Cowlshaw, G., Isaac, N. J. B., & Rowcliffe, J. M. (2005). How Far Do Animals Go?

- 469 Determinants of Day Range in Mammals. *The American Naturalist*, 165(2), 290–297.
- 470 doi:10.1086/426790
- 471 Cauchy, A. (1841). Note sur divers théorèmes relatifs à la rectification des courbes et à la quadrature des  
472 surfaces. *Comptes Rendus de l'Académie de Sciences*, 13, 1060–1065.
- 473 Celis-Murillo, A., Deppe, J. L., & Allen, M. F. (2009). Using soundscape recordings to estimate bird  
474 species abundance, richness, and composition. *Journal of Field Ornithology*, 80(1), 64–78.  
475 doi:10.1111/j.1557-9263.2009.00206.x
- 476 González-Ramos, M. S., Santos-Moreno, A., Rosas-Alquicira, E. F., & Fuentes-Mascorro, G. (2017).  
477 Validation of photo-identification as a mark-recapture method in the spotted eagle ray *Aetobatus*  
478 *narinari*. *Journal of Fish Biology*, 90(3), 1021–1030. doi:10.1111/jfb.13215
- 479 Hutchinson, J. M. C., & Waser, P. M. (2007). Use, misuse and extensions of “ideal gas” models of animal  
480 encounter. *Biological Reviews*, 82(3), 335–359. doi:10.1111/j.1469-185X.2007.00014.x
- 481 Jakobsen, L., Brinkløv, S., & Surlykke, A. (2013). Intensity and directionality of bat echolocation signals.  
482 *Frontiers in Physiology*, 4, 89. doi:10.3389/fphys.2013.00089
- 483 Karanth, K. U., Nichols, J. D., Kumar, S., & Hines, J. E. (2006). Assessing Tiger Population Dynamics Using  
484 Photographic Capture – Recapture Sampling. *Ecology*, 87(11), 2925–2937. doi:10.1890/0012-  
485 9623(2006)87[323:ATPD]2.0.CO;2
- 486 Keiter, D. A., Davis, A. J., Rhodes, O. E., Cunningham, F. L., Kilgo, J. C., Pepin, K. M., & Beasley, J. C.  
487 (2017). Effects of scale of movement, detection probability, and true population density on  
488 common methods of estimating population density. *Scientific Reports*, 7(1), 9446.  
489 doi:10.1038/s41598-017-09746-5
- 490 Kern, W. F., & Bland, J. R. (1938). *Solid mensuration with proofs* (2nd ed.). London: Chapman & Hall.

- 491 King, A. J., George, A., Buckle, D. J., Novak, P. A., & Fulton, C. J. (2018). Efficacy of remote underwater  
492 video cameras for monitoring tropical wetland fishes. *Hydrobiologia*, *807*(1), 145–164.  
493 doi:10.1007/s10750-017-3390-1
- 494 Lawrence, B. D., & Simmons, J. A. (1982). Measurements of atmospheric attenuation at ultrasonic  
495 frequencies and the significance for echolocation by bats. *The Journal of the Acoustical Society of*  
496 *America*, *71*(3), 585–590. doi:10.1121/1.387529
- 497 Lindseth, A., Lobel, P., Lindseth, A. V., & Lobel, P. S. (2018). Underwater Soundscape Monitoring and Fish  
498 Bioacoustics: A Review. *Fishes*, *3*(3), 36. doi:10.3390/fishes3030036
- 499 Mallet, D., & Pelletier, D. (2014). Underwater video techniques for observing coastal marine biodiversity:  
500 A review of sixty years of publications (1952–2012). *Fisheries Research*, *154*, 44–62.  
501 doi:10.1016/j.fishres.2014.01.019
- 502 Marques, T. A., Thomas, L., Martin, S. W., Mellinger, D. K., Ward, J. A., Moretti, D. J., ... Tyack, P. L.  
503 (2013). Estimating animal population density using passive acoustics. *Biological Reviews*, *88*(2),  
504 287–309. doi:10.1111/brv.12001
- 505 Meekan, M. G., Bradshaw, C. J. A., Press, M., McLean, C., Richards, A., & Quasnicka, S. (2006).  
506 Population size and structure of whale sharks *Rhincodon typus* at Ningaloo Reef, Western Australia  
507 . *Marine Ecology Progress Series*, *319*, 275–285.
- 508 Moeller, A. K., Lukacs, P. M., & Horne, J. S. (2018). Three novel methods to estimate abundance of  
509 unmarked animals using remote cameras. *Ecosphere*, *9*(8), e02331. doi:10.1002/ecs2.2331
- 510 Nakashima, Y., Fukasawa, K., & Samejima, H. (2018). Estimating animal density without individual  
511 recognition using information derivable exclusively from camera traps. *Journal of Applied Ecology*,  
512 *55*(2), 735–744. doi:10.1111/1365-2664.13059

- 513 O'Connell, A., Nichols, J., & Karanth, K. (2010). *Camera traps in animal ecology: methods and analyses*.
- 514 Patriquin, K. J., Hogberg, L. K., Chruszcz, B. J., Barclay, R. M. R., & Barclay, R. M. B. (2003). The influence  
515 of habitat structure on the ability to detect ultrasound using bat detectors. *Wildlife Society Bulletin*,  
516 *31*(2), 475–481.
- 517 Rowcliffe, J. M., Field, J., Turvey, S. T., & Carbone, C. (2008). Estimating animal density using camera  
518 traps without the need for individual recognition. *Journal of Applied Ecology*, *45*(4), 1228–1236.  
519 doi:10.1111/j.1365-2664.2008.01473.x
- 520 Schobernd, Z. H., Bacheler, N. M., & Conn, P. B. (2014). Examining the utility of alternative video  
521 monitoring metrics for indexing reef fish abundance. *Canadian Journal of Fisheries and Aquatic  
522 Sciences*, *71*(3), 464–471. doi:10.1139/cjfas-2013-0086
- 523 Sherman, C. S., Chin, A., Heupel, M. R., & Simpfendorfer, C. A. (2018). Are we underestimating  
524 elasmobranch abundances on baited remote underwater video systems (BRUVS) using traditional  
525 metrics? *Journal of Experimental Marine Biology and Ecology*, *503*, 80–85.  
526 doi:10.1016/J.JEMBE.2018.03.002
- 527 Snell-Rood, E. C. (2012). The effect of climate on acoustic signals: Does atmospheric sound absorption  
528 matter for bird song and bat echolocation? *The Journal of the Acoustical Society of America*,  
529 *131*(2), 1650–1658. doi:10.1121/1.3672695
- 530 Somerton, D. A., Williams, K., & Campbell, M. D. (2017). Quantifying the behavior of fish in response to a  
531 moving camera vehicle by using benthic stereo cameras and target tracking. *Fishery Bulletin*,  
532 *115*(3), 343–354. doi:10.7755/FB.115.3.5
- 533 Stobart, B., Díaz, D., Álvarez, F., Alonso, C., Mallol, S., & Goñi, R. (2015). Performance of Baited  
534 Underwater Video: Does It Underestimate Abundance at High Population Densities? *PLOS ONE*,

- 535           10(5), e0127559. doi:10.1371/journal.pone.0127559
- 536    Surlykke, A., & Kalko, E. K. V. (2008). Echolocating Bats Cry Out Loud to Detect Their Prey. *PLoS ONE*,
- 537           3(4), e2036. doi:10.1371/journal.pone.0002036
- 538    Vouk, V. (1948). Projected area of convex bodies. *Nature*, 162, 330–331. doi:10.1038/162330a0
- 539    Walther, B. A., & Moore, J. L. (2005). The concepts of bias, precision and accuracy, and their use in
- 540           testing the performance of species richness estimators, with a literature review of estimator
- 541           performance. *Ecography*, 28(6), 815–829. doi:10.1111/j.2005.0906-7590.04112.x
- 542    Weller, T. J., & Zabel, C. J. (2002). Variation in bat detections due to detector orientation in a forest.
- 543           *Wildlife Society Bulletin*, 30(3), 922–930.
- 544    Williams, K., Rooper, C. N., & Towler, R. (2010). Use of stereo camera systems for assessment of rockfish
- 545           abundance in untrawlable areas and for recording pollock behavior during midwater trawls. *Fishery*
- 546           *Bulletin*, 108(3), 352–362.
- 547    Willis, T., Millar, R., & Babcock, R. (2000). Detection of spatial variability in relative density of fishes:
- 548           comparison of visual census, angling, and baited underwater video. *Marine Ecology Progress*
- 549           *Series*, 198, 249–260.
- 550
